# Supplementary material for: Creation of mesostructured hollow Y zeolite by selective demetallation of an artificial heterogeneous Al distributed zeolite crystal
Source: Royal Society of Chemistry journal article supplement (doi:10.1039/c6cy01841f), 2016-01-01
Supplement: c6cy01841f1.pdf [file c6cy01841f1.pdf]

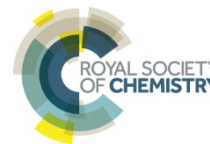

ARTICLE

## Supporting Information

### **Creation of mesostructured hollow Y zeolite by selective demetallation of artificial heterogeneous Al distributed zeolite crystal**

*Delin Yuan, Chunyan Kang, Wennian Wang, Hao Li, Xiaochun Zhu, Yandan Wang, Xionghou Gao, Baojie Wang, Hongjuan Zhao, Conghua Liu and Baojian Shen\**

#### **Table of contents**

##### **Figures**

Figure S1. SEM image (a) and TEM images (b) of the ST-AT zeolite.

Figure S2. The pore size distribution derived from mercury intrusion.

Figure S3.  $^{29}\text{Si}$  MAS NMR spectra of Y zeolites at different stages of the sequential treatments.

Figure S4. 1,3,5-Triisopropylbenzene conversion versus time on stream for the ST-AT-BT, ST and USY zeolites.

##### **Tables**

Table S1. Notation of samples obtained by  $\text{SiCl}_4$  treatment.

Table S2. Notation of acid and base treatment conditions.

Table S3. Texture properties of Y zeolites with different treatment.

Table S4. Chemical composition of the filtrates upon different treatments of Y sample.

Table S5. Properties of the Dalian vacuum gasoil.

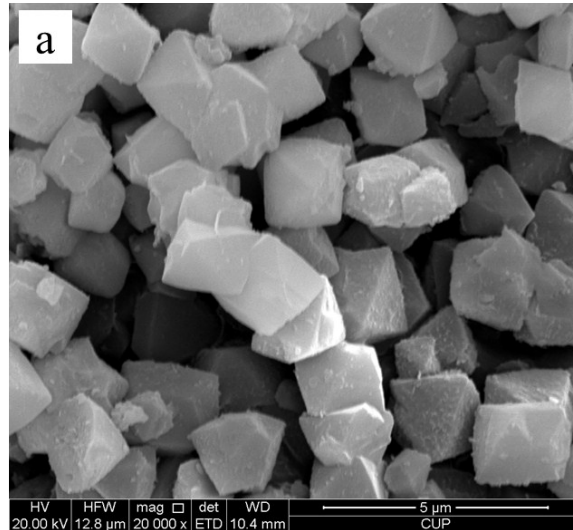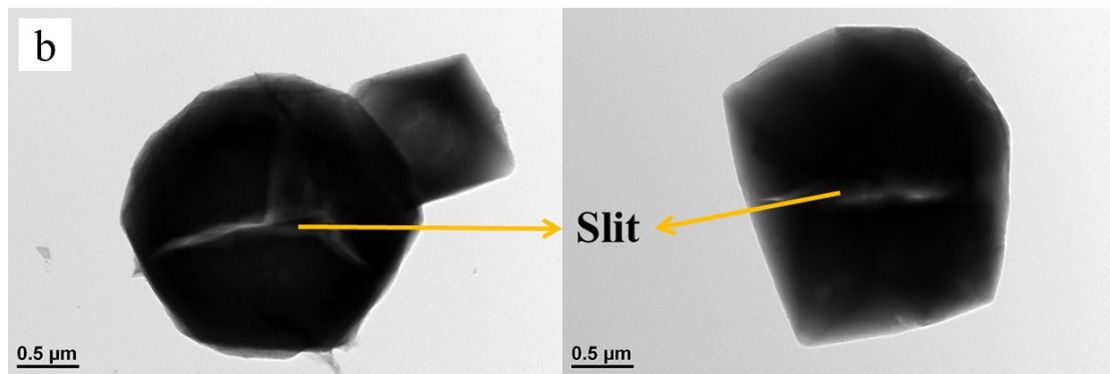

**Figure S1.** SEM image (a) and TEM images (b) of the ST-AT zeolite.

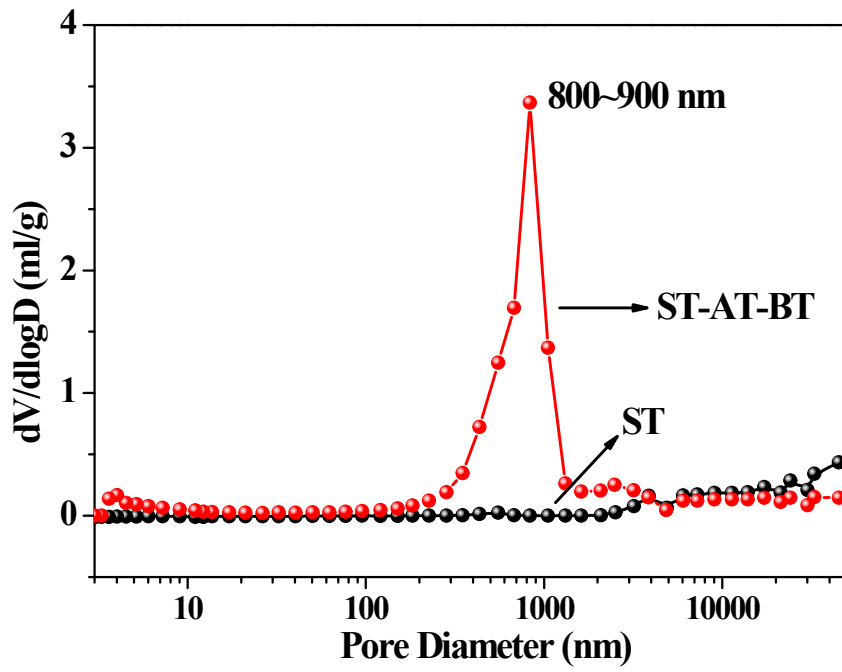

**Figure S2.** The pore size distribution derived from mercury intrusion.

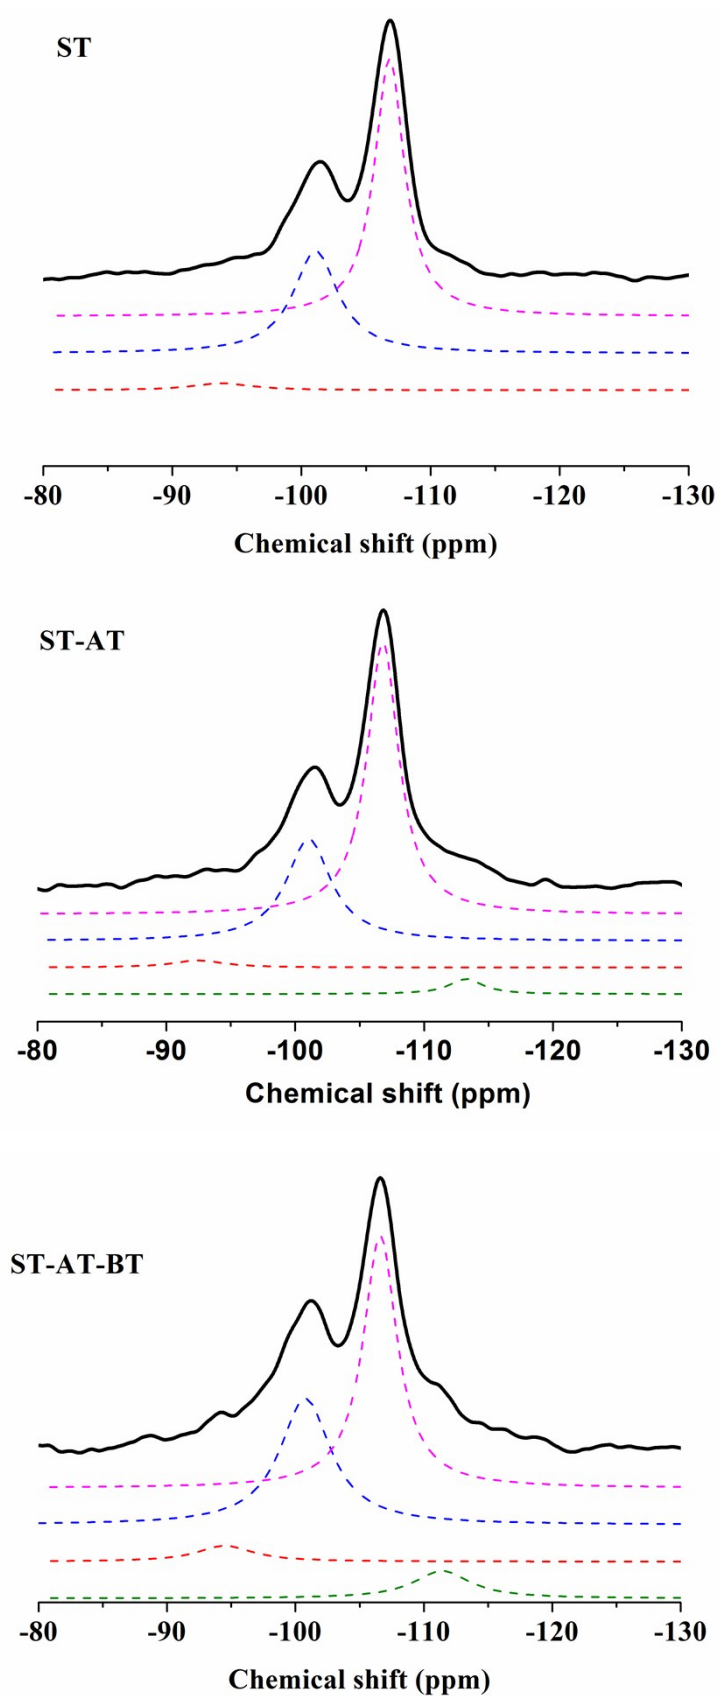

**Figure S3.**  $^{29}\text{Si}$  MAS NMR spectra of Y zeolites at different stages of the sequential treatments. Solid lines: experimentally observed spectra; Dashed lines: resolved components.

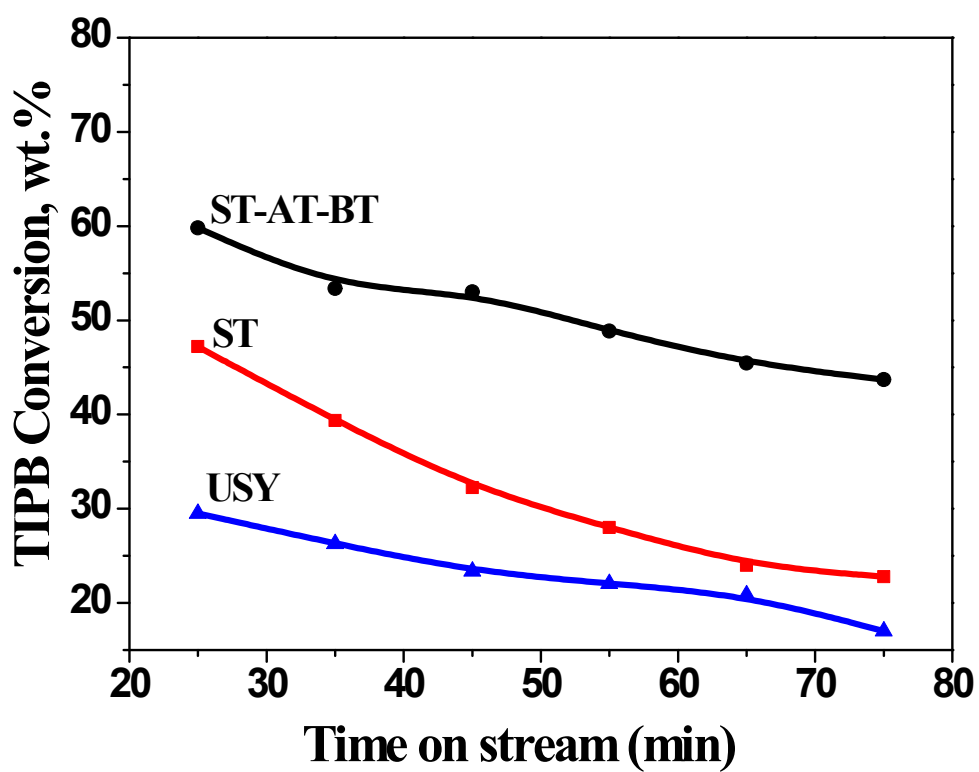

**Figure S4.** 1,3,5-Triisopropylbenzene conversion versus time on stream for the ST-AT-BT, ST and USY zeolites.

**Table S1.** Notation of samples obtained by SiCl<sub>4</sub> treatment.

| Treatment code | Temperature/K | Time/h | Si/Al <sup>a</sup> | Si/Al <sup>b</sup> |
|----------------|---------------|--------|--------------------|--------------------|
| ST             | 703           | 1      | 6.4                | 3.4                |
| ST2            | 703           | 1.5    | 9.8                | 4.2                |
| ST3            | 703           | 3      | 15.9               | 8.1                |

<sup>a</sup> Determined by XRD; <sup>b</sup> Determined by XRF.

**Table S2.** Notation of acid and base treatment conditions.

| Treatment code | Temperature/K | Time/h | Concentration/mol/L | Reagent             |
|----------------|---------------|--------|---------------------|---------------------|
| AT             | 363           | 1      | 0.5                 | HCl                 |
| AT1            | 363           | 1      | 0.2                 | HCl                 |
| AT2            | 363           | 1      | 1.0                 | HCl                 |
| OT             | 363           | 1      | 0.2                 | Oxalic acid         |
| ET             | 363           | 1      | 0.1                 | H <sub>4</sub> EDTA |
| BT             | 338           | 1      | 0.2                 | NaOH                |
| BT1            | 338           | 1      | 0.1                 | NaOH                |
| BT2            | 338           | 1      | 0.4                 | NaOH                |
| BT3            | 338           | 1      | 0.05                | NaOH                |

**Table S3.** Texture properties of Y zeolites with different treatment.

| Samples   | S <sub>BET</sub> <sup>a)</sup><br>m <sup>2</sup> g <sup>-1</sup> | S <sub>external</sub> <sup>b)</sup><br>m <sup>2</sup> g <sup>-1</sup> | V <sub>pore</sub> <sup>c)</sup><br>cm <sup>3</sup> g <sup>-1</sup> | V <sub>micro</sub> <sup>b)</sup><br>cm <sup>3</sup> g <sup>-1</sup> | V <sub>meso</sub> <sup>d)</sup><br>cm <sup>3</sup> g <sup>-1</sup> |
|-----------|------------------------------------------------------------------|-----------------------------------------------------------------------|--------------------------------------------------------------------|---------------------------------------------------------------------|--------------------------------------------------------------------|
| ST        | 595.0                                                            | 52.9                                                                  | 0.33                                                               | 0.25                                                                | 0.04                                                               |
| ST-AT     | 640.4                                                            | 61.5                                                                  | 0.34                                                               | 0.27                                                                | 0.04                                                               |
| ST-AT1    | 508.4                                                            | 54.2                                                                  | 0.28                                                               | 0.21                                                                | 0.05                                                               |
| ST-BT     | 563.1                                                            | 34.9                                                                  | 0.29                                                               | 0.24                                                                | 0.04                                                               |
| ST-BT2    | 692.9                                                            | 47.7                                                                  | 0.40                                                               | 0.30                                                                | 0.08                                                               |
| ST2       | 547.8                                                            | 44.6                                                                  | 0.31                                                               | 0.25                                                                | 0.04                                                               |
| ST2-AT    | 563.0                                                            | 56.5                                                                  | 0.29                                                               | 0.22                                                                | 0.06                                                               |
| ST2-AT1   | 563.0                                                            | 57.9                                                                  | 0.30                                                               | 0.23                                                                | 0.06                                                               |
| ST2-AT2   | 498.5                                                            | 61.5                                                                  | 0.27                                                               | 0.20                                                                | 0.05                                                               |
| ST2-BT    | 520.6                                                            | 70.8                                                                  | 0.30                                                               | 0.21                                                                | 0.07                                                               |
| ST2-BT2   | 411.4                                                            | 69.0                                                                  | 0.29                                                               | 0.16                                                                | 0.11                                                               |
| ST2-AT-BT | 685.0                                                            | 235.2                                                                 | 0.52                                                               | 0.22                                                                | 0.27                                                               |
| ST3       | 533.0                                                            | 34.9                                                                  | 0.31                                                               | 0.25                                                                | 0.05                                                               |
| ST3-BT1   | 257.0                                                            | 204.0                                                                 | 0.22                                                               | 0.02                                                                | 0.17                                                               |
| ST3-BT3   | 514.4                                                            | 68.2                                                                  | 0.29                                                               | 0.21                                                                | 0.06                                                               |
| ST3-AT-BT | 585.3                                                            | 224.3                                                                 | 0.40                                                               | 0.17                                                                | 0.21                                                               |

<sup>a)</sup> BET method; <sup>b)</sup> *t*-plot method; <sup>c)</sup> Volume adsorbed at  $p/p_0=0.99$ . <sup>d)</sup> Calculated from BJH, V<sub>meso</sub>= Volume in pores between 2-50 nm.

**Table S4.** Chemical composition of the filtrates upon different treatments of Y sample from ICP-OES analyse.

| Sample   | (Si/Al) <sub>filtrate</sub><br>(mol/mol) | [Si] <sub>filtrate</sub><br>(ppm) | [Al] <sub>filtrate</sub><br>(ppm) |
|----------|------------------------------------------|-----------------------------------|-----------------------------------|
| ST       | -                                        | -                                 | -                                 |
| ST-AT    | 0.1                                      | 139.5                             | 2531.4                            |
| ST-AT-BT | 166.9                                    | 5792.9                            | 34.7                              |

**Table S5.** Properties of the Dalian vacuum gasoil.

| Item                                              | Dalian vacuum gasoil |
|---------------------------------------------------|----------------------|
| Density (20 °C), g/cm <sup>3</sup>                | 0.93                 |
| Kinematic viscosity at 100 °C, mm <sup>2</sup> /s | 13.84                |
| Residual coke, wt%                                | 4.19                 |
| Saturates, wt%                                    | 64.68                |
| Aromatics, wt%                                    | 28.44                |
| C, wt%                                            | 86.76                |
| H, wt%                                            | 11.63                |
